# Supplementary material
Source: PubMed Central journal article supplement (PMC3986241)
Supplement: ja500463p_si_002.pdf [file ja500463p_si_002.pdf]

Crystallographic Information for

**Alkoxyboration: Ring-Closing Addition of B–O  $\sigma$  Bonds Across Alkynes**

Joshua J. Hirner, Darius J. Faizi and Suzanne A. Blum\*

*Department of Chemistry, University of California, Irvine, California 92697-2025*

Email: blums@uci.edu

X-ray Data Collection, Structure Solution and Refinement for **4b**.

A colorless crystal of approximate dimensions 0.311 x 0.174 x 0.122 mm was mounted on a glass fiber and transferred to a Bruker SMART APEX II diffractometer. The APEX2<sup>1</sup> program package was used to determine the unit-cell parameters and for data collection (45 sec/frame scan time for a sphere of diffraction data). The raw frame data was processed using SAINT<sup>2</sup> and SADABS<sup>3</sup> to yield the reflection data file. Subsequent calculations were carried out using the SHELXTL<sup>4</sup> program. The diffraction symmetry was *mmm* and the systematic absences were consistent with the orthorhombic space group *Pbcn* that was later determined to be correct.

The structure was solved by direct methods and refined on  $F^2$  by full-matrix least-squares techniques.<sup>5</sup> The analytical scattering factors<sup>6</sup> for neutral atoms were used throughout the analysis. There was half of an acetone solvent molecule present per formula-unit (hydrogen atoms were included using a riding model). All other hydrogen atoms were located from a difference-Fourier map and refined ( $x, y, z$  and  $U_{iso}$ ).

At convergence,  $wR2 = 0.1002$  and  $Goof = 1.025$  for 319 variables refined against 4734 data (0.73 Å),  $R1 = 0.0407$  for those 3950 data with  $I > 2.0\sigma(I)$ .

## References.

1. APEX2 Version 2013.6-2, Bruker AXS, Inc.; Madison, WI 2013.
  2. SAINT Version 8.32b, Bruker AXS, Inc.; Madison, WI 2013.
  3. Sheldrick, G. M. SADABS, Version 2008/1, Bruker AXS, Inc.; Madison, WI 2007.
  4. Sheldrick, G. M. SHELXTL, Version 2008/4, Bruker AXS, Inc.; Madison, WI 2008.
  5. Sheldrick, G. M. SHELXL-2013/3, Bruker AXS, Inc.; Madison, WI 2013.
  6. International Tables for X-Ray Crystallography 1992, Vol. C., Dordrecht: Kluwer Academic Publishers.
- 

## Definitions:

$$wR2 = [\Sigma[w(F_o^2 - F_c^2)^2] / \Sigma[w(F_o^2)^2]]^{1/2}$$

$$R1 = \Sigma||F_o| - |F_c|| / \Sigma|F_o|$$

Goof = S =  $[\Sigma[w(F_o^2 - F_c^2)^2] / (n-p)]^{1/2}$  where n is the number of reflections and p is the total number of parameters refined.

Table 1. Crystal data and structure refinement for **4b**.

|                                         |                                                                                        |          |
|-----------------------------------------|----------------------------------------------------------------------------------------|----------|
| Identification code                     | sab12 (Josh Hirner)                                                                    |          |
| Empirical formula                       | C <sub>19</sub> H <sub>16</sub> BNO <sub>5</sub> · ½ (C <sub>3</sub> H <sub>6</sub> O) |          |
| Formula weight                          | 378.18                                                                                 |          |
| Temperature                             | 83(2) K                                                                                |          |
| Wavelength                              | 0.71073 Å                                                                              |          |
| Crystal system                          | Orthorhombic                                                                           |          |
| Space group                             | <i>Pbcn</i>                                                                            |          |
| Unit cell dimensions                    | a = 6.6172(3) Å                                                                        | α = 90°. |
|                                         | b = 15.1115(7) Å                                                                       | β = 90°. |
|                                         | c = 37.1855(18) Å                                                                      | γ = 90°. |
| Volume                                  | 3718.4(3) Å <sup>3</sup>                                                               |          |
| Z                                       | 8                                                                                      |          |
| Density (calculated)                    | 1.351 Mg/m <sup>3</sup>                                                                |          |
| Absorption coefficient                  | 0.097 mm <sup>-1</sup>                                                                 |          |
| F(000)                                  | 1584                                                                                   |          |
| Crystal color                           | colorless                                                                              |          |
| Crystal size                            | 0.311 x 0.174 x 0.122 mm <sup>3</sup>                                                  |          |
| Theta range for data collection         | 2.191 to 29.136°                                                                       |          |
| Index ranges                            | -9 ≤ h ≤ 8, -20 ≤ k ≤ 20, -50 ≤ l ≤ 50                                                 |          |
| Reflections collected                   | 29859                                                                                  |          |
| Independent reflections                 | 4734 [R(int) = 0.0301]                                                                 |          |
| Completeness to theta = 25.242°         | 99.8 %                                                                                 |          |
| Absorption correction                   | Semi-empirical from equivalents                                                        |          |
| Max. and min. transmission              | 0.8622 and 0.8140                                                                      |          |
| Refinement method                       | Full-matrix least-squares on F <sup>2</sup>                                            |          |
| Data / restraints / parameters          | 4734 / 0 / 319                                                                         |          |
| Goodness-of-fit on F <sup>2</sup>       | 1.025                                                                                  |          |
| Final R indices [I > 2σ(I) = 3950 data] | R1 = 0.0407, wR2 = 0.0942                                                              |          |
| R indices (all data, 0.73 Å)            | R1 = 0.0516, wR2 = 0.1002                                                              |          |
| Largest diff. peak and hole             | 0.478 and -0.267 e.Å <sup>-3</sup>                                                     |          |

Table 2. Atomic coordinates ( $\times 10^4$ ) and equivalent isotropic displacement parameters ( $\text{\AA}^2 \times 10^3$ ) for **4b**.  $U(\text{eq})$  is defined as one third of the trace of the orthogonalized  $U^{ij}$  tensor.

|       | x        | y        | z       | $U(\text{eq})$ |
|-------|----------|----------|---------|----------------|
| B(1)  | 892(2)   | 1174(1)  | 1488(1) | 13(1)          |
| N(1)  | 2525(2)  | 651(1)   | 1756(1) | 13(1)          |
| O(1)  | 401(1)   | 527(1)   | 495(1)  | 16(1)          |
| O(2)  | -1066(1) | 948(1)   | 1652(1) | 16(1)          |
| O(3)  | -2361(1) | 238(1)   | 2127(1) | 20(1)          |
| O(4)  | 1380(1)  | 2114(1)  | 1564(1) | 17(1)          |
| O(5)  | 3481(2)  | 2962(1)  | 1886(1) | 25(1)          |
| C(1)  | 1993(2)  | 1106(1)  | 480(1)  | 15(1)          |
| C(2)  | 2978(2)  | 1356(1)  | 167(1)  | 18(1)          |
| C(3)  | 4588(2)  | 1939(1)  | 208(1)  | 21(1)          |
| C(4)  | 5151(2)  | 2250(1)  | 549(1)  | 21(1)          |
| C(5)  | 4126(2)  | 1986(1)  | 858(1)  | 18(1)          |
| C(6)  | 2494(2)  | 1399(1)  | 824(1)  | 14(1)          |
| C(7)  | 1078(2)  | 973(1)   | 1071(1) | 13(1)          |
| C(8)  | -100(2)  | 453(1)   | 856(1)  | 14(1)          |
| C(9)  | -1748(2) | -185(1)  | 913(1)  | 14(1)          |
| C(10) | -3431(2) | -169(1)  | 684(1)  | 17(1)          |
| C(11) | -4927(2) | -811(1)  | 714(1)  | 19(1)          |
| C(12) | -4757(2) | -1475(1) | 972(1)  | 19(1)          |
| C(13) | -3107(2) | -1490(1) | 1202(1) | 19(1)          |
| C(14) | -1603(2) | -852(1)  | 1173(1) | 17(1)          |
| C(15) | -935(2)  | 449(1)   | 1945(1) | 14(1)          |
| C(16) | 1206(2)  | 154(1)   | 2013(1) | 16(1)          |
| C(17) | 2863(2)  | 2244(1)  | 1797(1) | 18(1)          |
| C(18) | 3691(2)  | 1378(1)  | 1935(1) | 23(1)          |
| C(19) | 3903(2)  | 30(1)    | 1562(1) | 18(1)          |
| O(6)  | 0        | 1849(1)  | 2500    | 30(1)          |
| C(20) | 0        | 2642(1)  | 2500    | 24(1)          |
| C(21) | 1443(4)  | 3144(2)  | 2727(1) | 71(1)          |

Table 3. Bond lengths [Å] and angles [°] for **4b**.

---

|               |            |
|---------------|------------|
| B(1)-O(2)     | 1.4732(16) |
| B(1)-O(4)     | 1.4831(16) |
| B(1)-C(7)     | 1.5838(17) |
| B(1)-N(1)     | 1.6694(16) |
| N(1)-C(19)    | 1.4942(15) |
| N(1)-C(16)    | 1.4960(16) |
| N(1)-C(18)    | 1.4991(16) |
| O(1)-C(1)     | 1.3705(15) |
| O(1)-C(8)     | 1.3885(14) |
| O(2)-C(15)    | 1.3276(14) |
| O(3)-C(15)    | 1.2040(15) |
| O(4)-C(17)    | 1.3222(16) |
| O(5)-C(17)    | 1.2072(15) |
| C(1)-C(2)     | 1.3845(17) |
| C(1)-C(6)     | 1.3954(16) |
| C(2)-C(3)     | 1.3907(19) |
| C(3)-C(4)     | 1.4024(19) |
| C(4)-C(5)     | 1.3928(18) |
| C(5)-C(6)     | 1.4034(18) |
| C(6)-C(7)     | 1.4612(16) |
| C(7)-C(8)     | 1.3657(17) |
| C(8)-C(9)     | 1.4709(17) |
| C(9)-C(14)    | 1.4013(17) |
| C(9)-C(10)    | 1.4021(17) |
| C(10)-C(11)   | 1.3902(18) |
| C(11)-C(12)   | 1.3925(19) |
| C(12)-C(13)   | 1.3881(19) |
| C(13)-C(14)   | 1.3889(18) |
| C(15)-C(16)   | 1.5070(17) |
| C(17)-C(18)   | 1.5094(18) |
| O(6)-C(20)    | 1.198(2)   |
| C(20)-C(21)#1 | 1.483(2)   |
| C(20)-C(21)   | 1.483(2)   |

|                   |            |
|-------------------|------------|
| O(2)-B(1)-O(4)    | 109.50(10) |
| O(2)-B(1)-C(7)    | 115.46(10) |
| O(4)-B(1)-C(7)    | 110.74(10) |
| O(2)-B(1)-N(1)    | 102.20(9)  |
| O(4)-B(1)-N(1)    | 101.44(9)  |
| C(7)-B(1)-N(1)    | 116.32(10) |
| C(19)-N(1)-C(16)  | 110.39(9)  |
| C(19)-N(1)-C(18)  | 111.16(10) |
| C(16)-N(1)-C(18)  | 112.59(10) |
| C(19)-N(1)-B(1)   | 113.85(9)  |
| C(16)-N(1)-B(1)   | 104.01(9)  |
| C(18)-N(1)-B(1)   | 104.59(9)  |
| C(1)-O(1)-C(8)    | 105.92(9)  |
| C(15)-O(2)-B(1)   | 114.53(9)  |
| C(17)-O(4)-B(1)   | 115.38(10) |
| O(1)-C(1)-C(2)    | 124.74(11) |
| O(1)-C(1)-C(6)    | 110.34(10) |
| C(2)-C(1)-C(6)    | 124.92(12) |
| C(1)-C(2)-C(3)    | 116.29(12) |
| C(2)-C(3)-C(4)    | 120.86(12) |
| C(5)-C(4)-C(3)    | 121.40(12) |
| C(4)-C(5)-C(6)    | 118.87(12) |
| C(1)-C(6)-C(5)    | 117.66(11) |
| C(1)-C(6)-C(7)    | 106.57(11) |
| C(5)-C(6)-C(7)    | 135.76(11) |
| C(8)-C(7)-C(6)    | 104.54(10) |
| C(8)-C(7)-B(1)    | 129.76(11) |
| C(6)-C(7)-B(1)    | 125.44(11) |
| C(7)-C(8)-O(1)    | 112.61(10) |
| C(7)-C(8)-C(9)    | 135.72(11) |
| O(1)-C(8)-C(9)    | 111.65(10) |
| C(14)-C(9)-C(10)  | 119.11(11) |
| C(14)-C(9)-C(8)   | 121.36(11) |
| C(10)-C(9)-C(8)   | 119.35(11) |
| C(11)-C(10)-C(9)  | 120.31(12) |
| C(10)-C(11)-C(12) | 120.04(13) |

|                     |            |
|---------------------|------------|
| C(13)-C(12)-C(11)   | 120.00(12) |
| C(12)-C(13)-C(14)   | 120.32(12) |
| C(13)-C(14)-C(9)    | 120.21(12) |
| O(3)-C(15)-O(2)     | 124.09(12) |
| O(3)-C(15)-C(16)    | 124.38(11) |
| O(2)-C(15)-C(16)    | 111.50(10) |
| N(1)-C(16)-C(15)    | 107.05(9)  |
| O(5)-C(17)-O(4)     | 124.38(12) |
| O(5)-C(17)-C(18)    | 124.25(12) |
| O(4)-C(17)-C(18)    | 111.37(10) |
| N(1)-C(18)-C(17)    | 107.21(10) |
| O(6)-C(20)-C(21)#1  | 120.77(14) |
| O(6)-C(20)-C(21)    | 120.77(14) |
| C(21)#1-C(20)-C(21) | 118.5(3)   |

---

Symmetry transformations used to generate equivalent atoms:

#1  $-x,y,-z+1/2$

Table 4. Anisotropic displacement parameters ( $\text{\AA}^2 \times 10^3$ ) for **4b**. The anisotropic displacement factor exponent takes the form:  $-2\pi^2 [ h^2 a^{*2} U^{11} + \dots + 2 h k a^* b^* U^{12} ]$

|       | U <sup>11</sup> | U <sup>22</sup> | U <sup>33</sup> | U <sup>23</sup> | U <sup>13</sup> | U <sup>12</sup> |
|-------|-----------------|-----------------|-----------------|-----------------|-----------------|-----------------|
| B(1)  | 14(1)           | 12(1)           | 14(1)           | 1(1)            | 0(1)            | 4(1)            |
| N(1)  | 14(1)           | 11(1)           | 14(1)           | -1(1)           | 0(1)            | 2(1)            |
| O(1)  | 17(1)           | 18(1)           | 12(1)           | 0(1)            | 2(1)            | -3(1)           |
| O(2)  | 14(1)           | 22(1)           | 13(1)           | 4(1)            | 1(1)            | 3(1)            |
| O(3)  | 19(1)           | 24(1)           | 16(1)           | 1(1)            | 3(1)            | -3(1)           |
| O(4)  | 24(1)           | 12(1)           | 15(1)           | -1(1)           | 0(1)            | 4(1)            |
| O(5)  | 31(1)           | 14(1)           | 30(1)           | -4(1)           | 0(1)            | -3(1)           |
| C(1)  | 14(1)           | 14(1)           | 16(1)           | 2(1)            | 0(1)            | 1(1)            |
| C(2)  | 21(1)           | 20(1)           | 14(1)           | 1(1)            | 2(1)            | 0(1)            |
| C(3)  | 22(1)           | 23(1)           | 18(1)           | 4(1)            | 5(1)            | -2(1)           |
| C(4)  | 20(1)           | 21(1)           | 23(1)           | 1(1)            | 3(1)            | -5(1)           |
| C(5)  | 19(1)           | 18(1)           | 17(1)           | -1(1)           | 1(1)            | -1(1)           |
| C(6)  | 15(1)           | 13(1)           | 15(1)           | 1(1)            | 2(1)            | 3(1)            |
| C(7)  | 14(1)           | 12(1)           | 14(1)           | 2(1)            | 1(1)            | 2(1)            |
| C(8)  | 15(1)           | 14(1)           | 12(1)           | 1(1)            | 2(1)            | 3(1)            |
| C(9)  | 15(1)           | 13(1)           | 15(1)           | -2(1)           | 3(1)            | 0(1)            |
| C(10) | 18(1)           | 17(1)           | 15(1)           | -1(1)           | 2(1)            | 1(1)            |
| C(11) | 17(1)           | 22(1)           | 18(1)           | -5(1)           | 2(1)            | -1(1)           |
| C(12) | 20(1)           | 16(1)           | 22(1)           | -5(1)           | 7(1)            | -3(1)           |
| C(13) | 23(1)           | 13(1)           | 21(1)           | 0(1)            | 7(1)            | 1(1)            |
| C(14) | 18(1)           | 16(1)           | 16(1)           | -1(1)           | 2(1)            | 2(1)            |
| C(15) | 17(1)           | 12(1)           | 13(1)           | -2(1)           | 0(1)            | 0(1)            |
| C(16) | 18(1)           | 17(1)           | 15(1)           | 4(1)            | 2(1)            | 3(1)            |
| C(17) | 19(1)           | 15(1)           | 18(1)           | -1(1)           | 4(1)            | 1(1)            |
| C(18) | 21(1)           | 14(1)           | 34(1)           | -5(1)           | -11(1)          | 1(1)            |
| C(19) | 17(1)           | 20(1)           | 17(1)           | -2(1)           | 2(1)            | 8(1)            |
| O(6)  | 46(1)           | 15(1)           | 28(1)           | 0               | 0(1)            | 0               |
| C(20) | 34(1)           | 17(1)           | 21(1)           | 0               | 12(1)           | 0               |
| C(21) | 88(2)           | 75(2)           | 48(1)           | -36(1)          | 33(1)           | -60(1)          |

Table 5. Hydrogen coordinates ( $\times 10^4$ ) and isotropic displacement parameters ( $\text{\AA}^2 \times 10^{-3}$ ) for **4b**.

|        | x         | y         | z       | U(eq) |
|--------|-----------|-----------|---------|-------|
| H(21A) | 2079      | 3610      | 2583    | 106   |
| H(21B) | 2485      | 2742      | 2818    | 106   |
| H(21C) | 719       | 3411      | 2929    | 106   |
| H(2)   | 2570(20)  | 1147(10)  | -66(4)  | 21(4) |
| H(3)   | 5310(30)  | 2126(11)  | -4(4)   | 24(4) |
| H(4)   | 6320(30)  | 2658(11)  | 570(5)  | 30(4) |
| H(5)   | 4530(20)  | 2206(10)  | 1094(4) | 18(4) |
| H(10)  | -3570(20) | 302(10)   | 499(4)  | 15(4) |
| H(11)  | -6090(30) | -793(11)  | 551(5)  | 26(4) |
| H(12)  | -5750(30) | -1916(12) | 986(4)  | 28(4) |
| H(13)  | -3000(20) | -1963(10) | 1386(4) | 20(4) |
| H(14)  | -370(20)  | -885(10)  | 1332(4) | 22(4) |
| H(16A) | 1590(20)  | 262(11)   | 2260(4) | 24(4) |
| H(16B) | 1300(30)  | -483(12)  | 1969(5) | 32(5) |
| H(18A) | 3530(30)  | 1356(13)  | 2206(5) | 42(5) |
| H(18B) | 5100(30)  | 1319(13)  | 1872(5) | 44(5) |
| H(19A) | 3050(30)  | -411(11)  | 1437(4) | 28(4) |
| H(19B) | 4770(30)  | -253(11)  | 1742(4) | 23(4) |
| H(19C) | 4690(30)  | 362(11)   | 1390(5) | 28(4) |
